# Supplementary material for: A processable Prussian blue analogue-mediated route to promote alkaline electrocatalytic water splitting over bifunctional copper phosphide
Source: Royal Society of Chemistry journal article supplement (doi:10.1039/d2dt02013k), 2022-01-01
Supplement: d2dt02013k1.pdf [file d2dt02013k1.pdf]

## Supplementary Information

# A processable Prussian blue analogue-mediated route to promote alkaline electrocatalytic water splitting over bifunctional copper phosphide

Jiahui Chen,<sup>a,b</sup> Yunming Li,<sup>\*c</sup> Huangqing Ye,<sup>d</sup> Pengli Zhu,<sup>e</sup> Xian-Zhu Fu,<sup>\*a</sup> and Rong Sun<sup>e</sup>

<sup>a</sup> College of Materials Science and Engineering, Shenzhen University, Shenzhen 518060, China

<sup>b</sup> College of Physics and Optoelectronic Engineering, Shenzhen University, Shenzhen 518060, China

<sup>c</sup> School of New Energy Science and Engineering, Xinyu University, Xinyu 338004, China

<sup>d</sup> SZU-NUS Collaborative Innovation Center for Optoelectronic Science & Technology, Institute of Microscale Optoelectronics, Shenzhen University, Shenzhen 518060, China.

<sup>e</sup> Shenzhen Institutes of Advanced Technology, Chinese Academy of Sciences, Shenzhen 518055, China

\* Corresponding authors:

E-mail: 395591748@qq.com (Y. Li)

E-mail: xz.fu@szu.edu.cn (X. -Z. Fu)

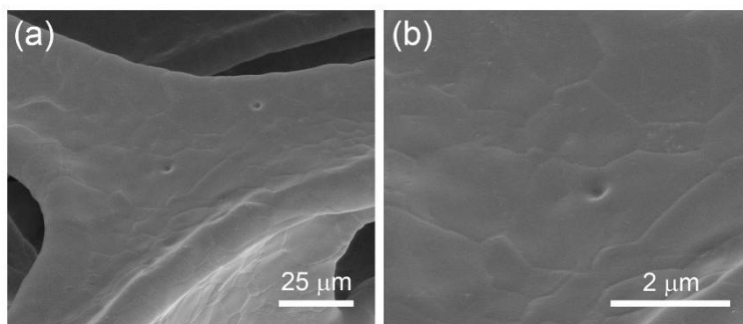

**Fig. S1** SEM images of the copper foam in different magnifications.

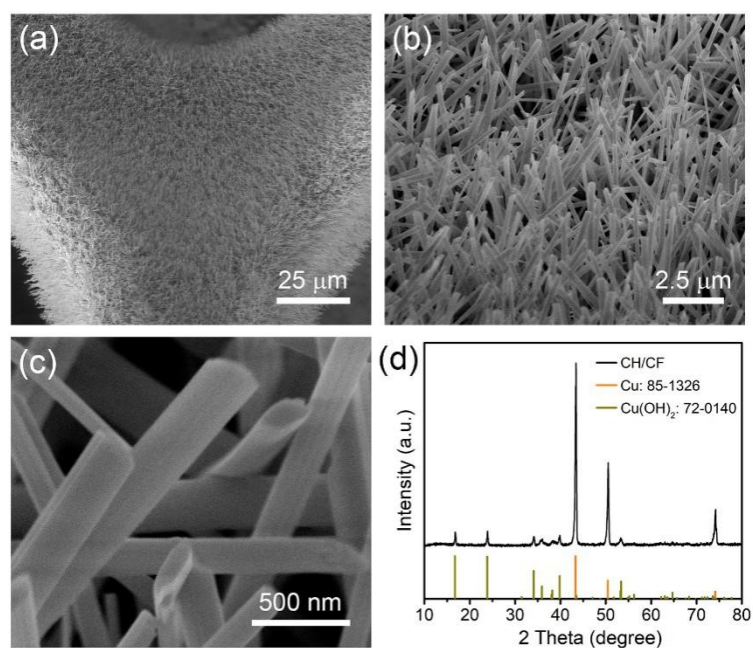

**Fig. S2** (a-c) SEM images of CH/CF in different magnifications and (d) XRD pattern of CH/CF.

**Table S1** Optimization of the synthetic parameters of CH@PBA/CF.

| Samples     | H <sub>2</sub> O | 0.1 M HCl | K <sub>3</sub> [Co(CN) <sub>6</sub> ] | Reaction times |
|-------------|------------------|-----------|---------------------------------------|----------------|
| CH@PBA/CF-1 | 40 mL            | 1 mL      | 100 mg                                | 4 h            |
| CH@PBA/CF-2 | 40 mL            | 0.5 mL    | 100 mg                                | 4 h            |
| CH@PBA/CF-3 | 40 mL            | 1.5 mL    | 100 mg                                | 4 h            |
| CH@PBA/CF-4 | 40 mL            | 1 mL      | 100 mg                                | 2 h            |
| CH@PBA/CF-5 | 40 mL            | 1 mL      | 100 mg                                | 6 h            |

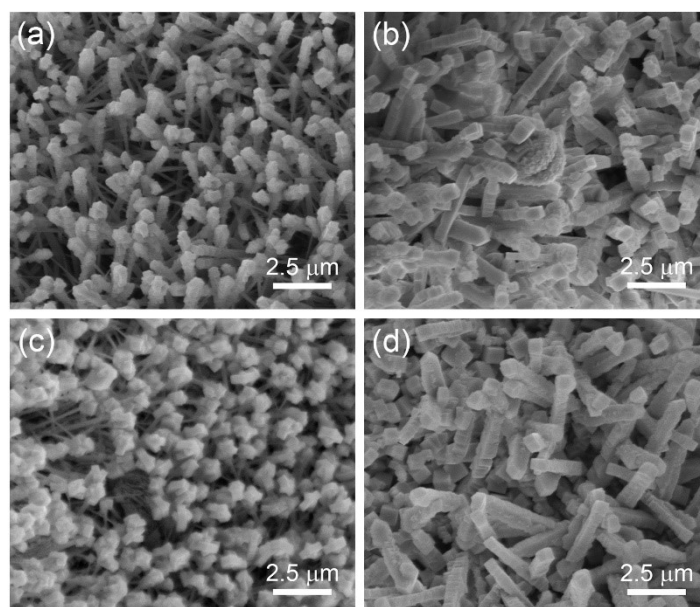

**Fig. S3** SEM images of samples obtained by using different synthetic parameters in Table S1: (a) CH@PBA/CF-2, (b) CH@PBA/CF-3, (c) CH@PBA/CF-4 and (d) CH@PBA/CF-5.

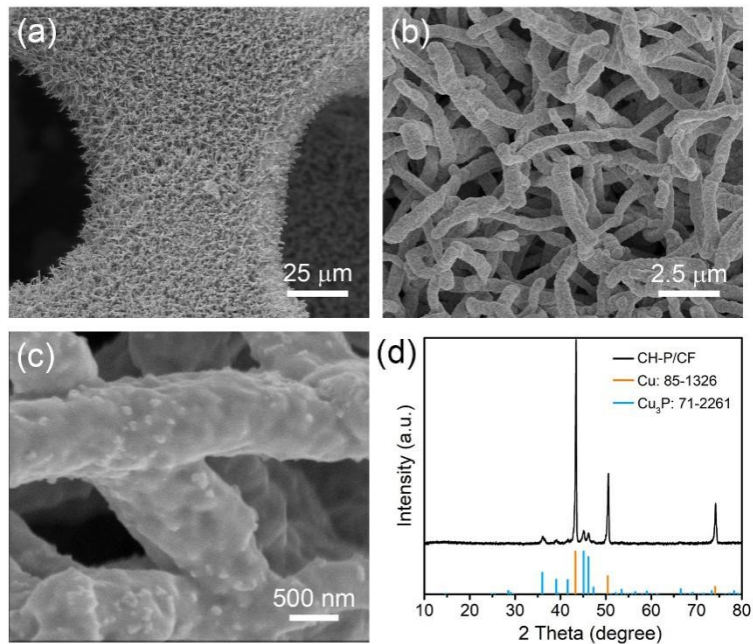

**Fig. S4** (a-c) SEM images of CH-P/CF in different magnifications and (d) XRD pattern of CH-P/CF.

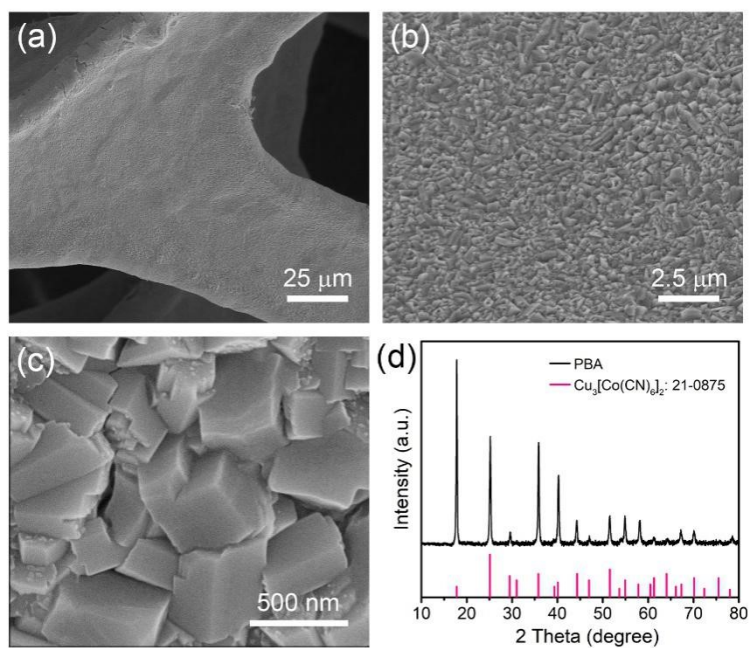

**Fig. S5** (a-c) SEM images of PBA/CF in different magnifications and (d) XRD pattern of PBA powder scrapped from the copper foam.

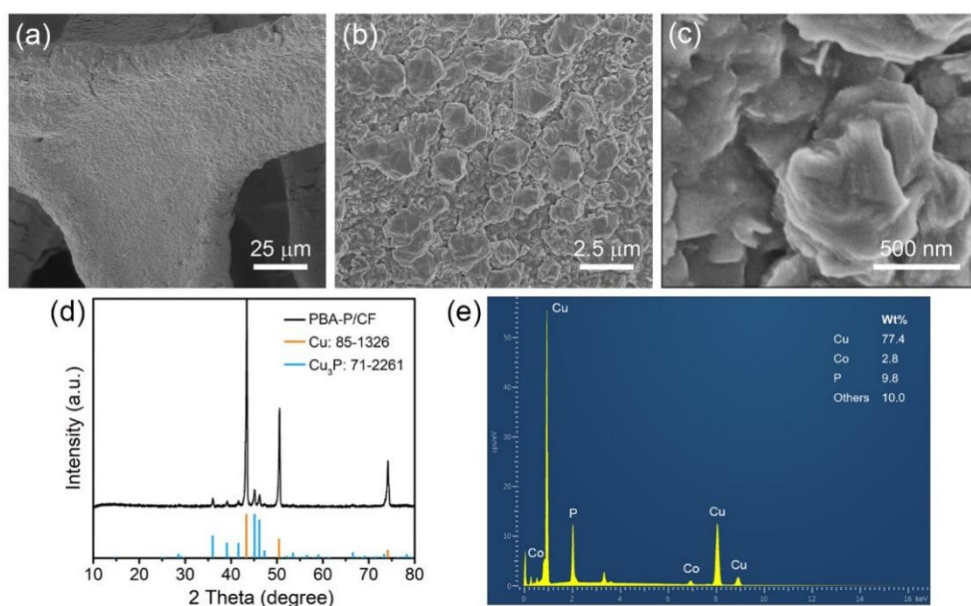

**Fig. S6** (a-c) SEM images in different magnifications, (d) XRD pattern and (e) SEM EDS spectrum of PBA-P/CF.

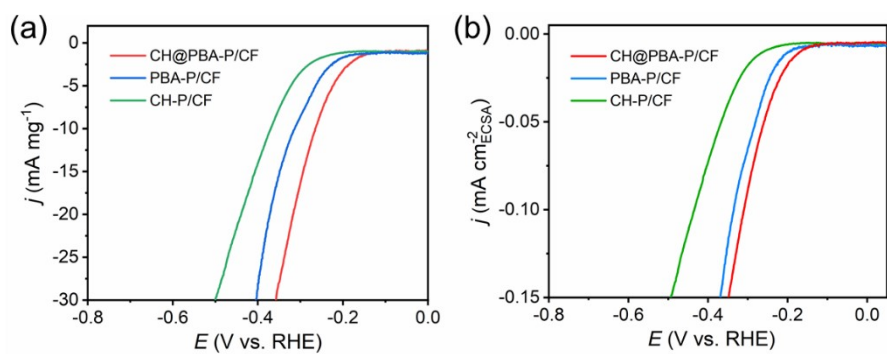

**Fig. S7** The LSV curves normalized to (a) mass loading and (b) ECSA.

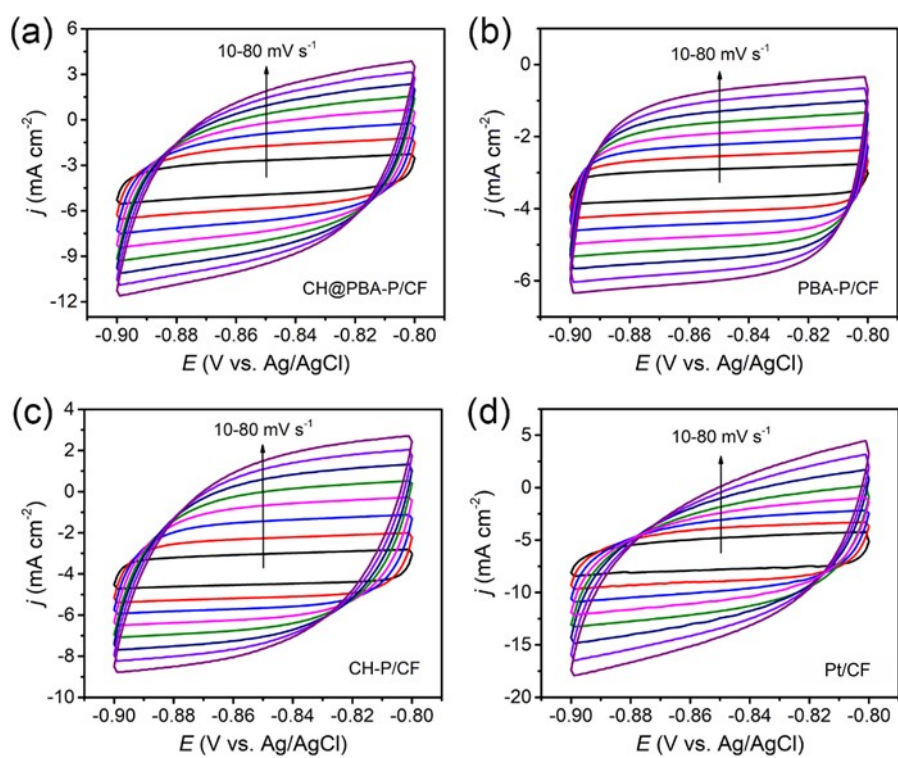

**Fig. S8** Cyclic voltammetry curves of the electrocatalysts in the region of -0.8~0.9 V vs. Ag/AgCl at various scan rates: (a) CH@PBA-P/CF, (b) PBA-P/CF, (c) CH-P/CF and (d) Pt/CF.

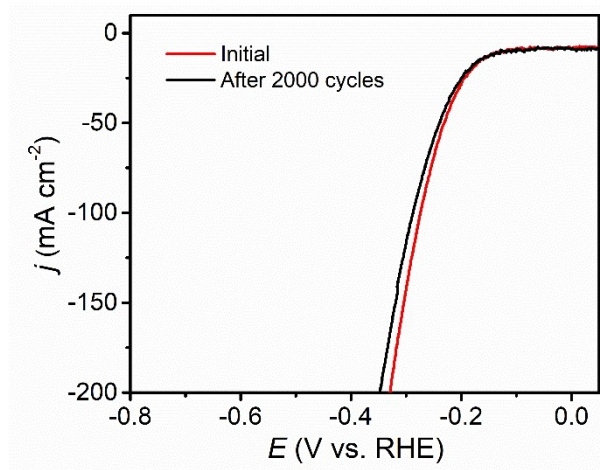

**Fig. S9** The LSV curves before and after 1000 CV cycles in 1 M KOH.

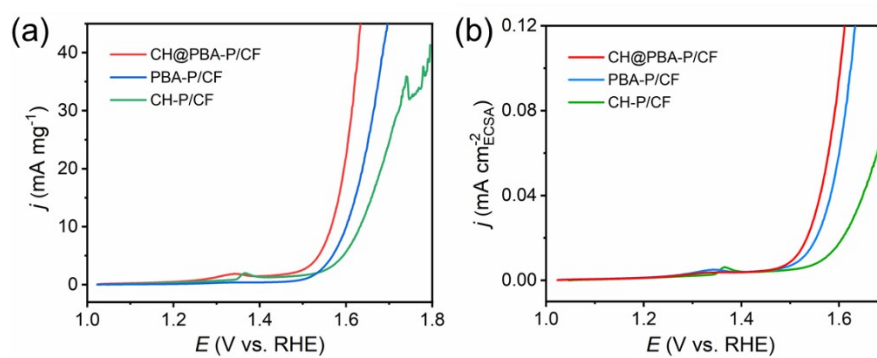

**Fig. S10** The LSV curves normalized to (a) mass loading and (b) ECSA.

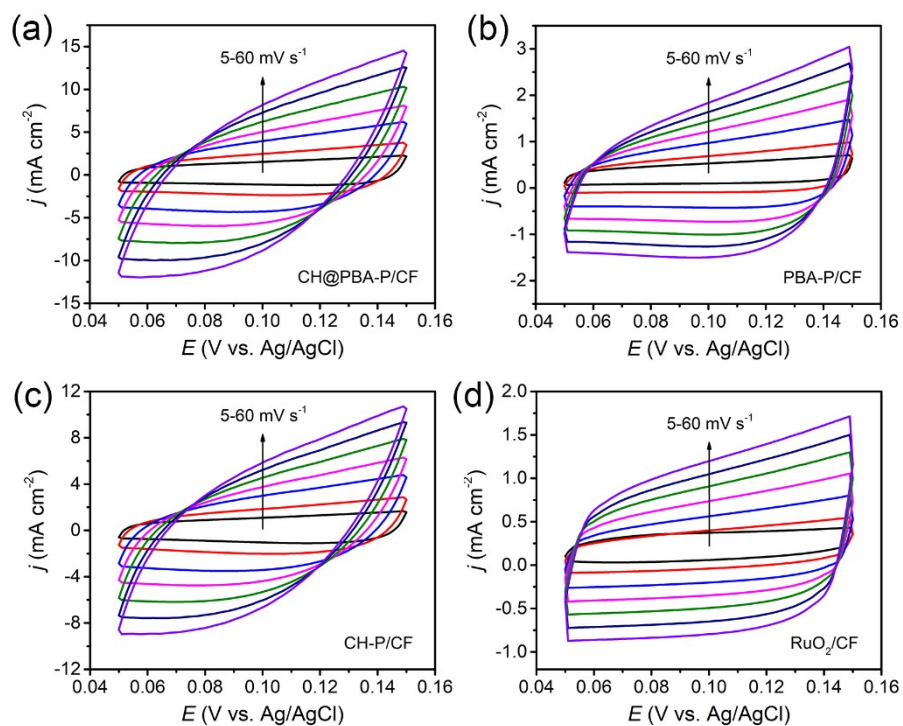

**Fig. S11** Cyclic voltammety curves of the electrocatalysts in the region of 0.05~0.15 V vs. Ag/AgCl at various scan rates: (a) CH@PBA-P/CF, (b) PBA-P/CF, (c) CH-P/CF and (d) RuO<sub>2</sub>/CF.

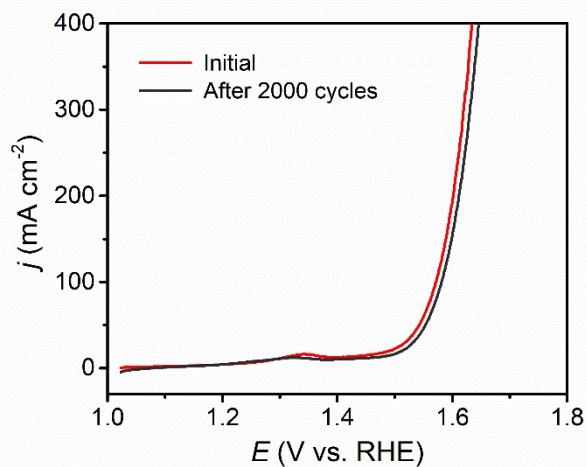

**Fig. S12** The LSV curves before and after 1000 CV cycles in 1 M KOH.

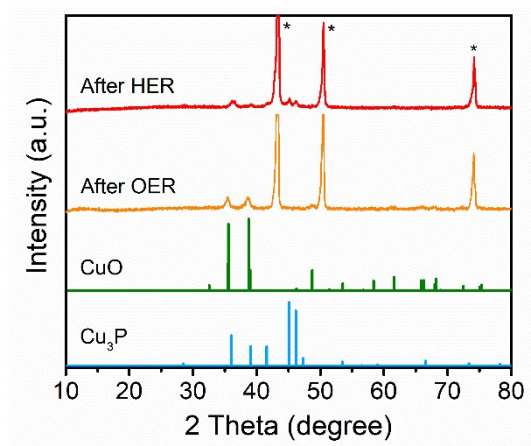

**Fig. S13** XRD patterns of CH@PBA-P/CF after chronoamperometry measurements for overall water splitting.



**Table S2** Comparison of the catalytic activity of CH@PBA-P/CF with other reported copper-based electrocatalysts.

| Catalysts                             | Substrate* | HER (mV)    |              | OER (mV)    |              | References |
|---------------------------------------|------------|-------------|--------------|-------------|--------------|------------|
|                                       |            | $\eta_{50}$ | $\eta_{100}$ | $\eta_{50}$ | $\eta_{100}$ |            |
| CH@PBA-P/CF                           | CF         | 231         | 274          | 312         | 341          | This work  |
| CuNiS                                 | NF         | 151         | 225          | 398         | 426          | 1          |
| CoMoS                                 | NF         | 213         | 238          | 350         | 395          | 2          |
| Mn/Ni-doped Cu <sub>2</sub> S         | Monolith   | 136         | 160          | 317         | 330          | 3          |
| CuNi@NiFeCu                           | CP         | 185         | ~200         | 285         | 297          | 4          |
| Cu <sub>3</sub> P/Ni <sub>2</sub> P   | CF         | ~180        | ~220         | 330         | 400          | 5          |
| Co-Cu-P                               | NF         | 153         | 182          | 343         | 365          | 6          |
| CuNiFeCrCo                            | NF         | ~170        | 180          | ~295        | 315          | 7          |
| Cu <sub>2</sub> S/Co(OH) <sub>2</sub> | CF         | 241         | /            | 268         | /            | 8          |
| Cu <sub>2</sub> S@CoS                 | CF         | 235         | /            | 275         | /            | 9          |
| Cu-Co-P                               | Cu foil    | 288         | /            | 425         | /            | 10         |
| Cu <sub>3</sub> P@NiFeMOF             | CF         | 350         | /            | 345         | /            | 11         |
| NiCu/NiCuN@NC                         | NF         | /           | 149          | /           | 295          | 12         |
| Cu <sub>3</sub> N/CuO                 | NF         | /           | 280          | /           | 425          | 13         |
| CuNiS                                 | CP         | /           | ~300         | /           | ~410         | 14         |
| CoNiS@CuO                             | CF         | /           | ~175         | /           | 314          | 15         |
| NiCu                                  | Cu foil    | /           | 167          | /           | ~390         | 16         |

Note: \* CF = copper foam, NF = nickel foam, CP = carbon paper.

## Reference

- 1 D. Chinnadurai, R. Rajendiran and P. Kandasamy, *J. Colloid Interface Sci.*, 2022, **606**, 101-112.
- 2 A. Sajeev, V. K. Mariappan, D. Kesavan, K. Krishnamoorthy and S.-J. Kim, *Mater. Adv.*, 2021, **2**, 455-463.
- 3 H. Yuan, S. Zheng, S. Sang, J. Yang, J. Sun, Z. Ma and X. Wang, *Int. J. Hydrogen Energy*, 2022, **47**, 11827-11840.

- 4 D. Cao, H. Xu and D. Cheng, *Appl. Catal. B: Environ.*, 2021, **298**, 120600.
- 5 H. Liu, J. Gao, X. Xu, Q. Jia, L. Yang, S. Wang and D. Cao, *Chem. Eng. J.*, 2022, **448**, 137706.
- 6 Y. Liu, Y. Yang, B. Chen, X. Li, M. Guo, Y. Yang, K. Xu and C. Yuan, *Inorg. Chem.*, 2021, **60**, 18325-18336.
- 7 B. Nourmohammadi Khiarak, M. Mojaddami, Z. Zamani Faradonbeh, A. O. Zekiy and A. Simchi, *Energy Fuels*, 2022, **36**, 4502-4509.
- 8 D. Wang, J. Li, Y. Zhao, H. Xu and J. Zhao, *Electrochim. Acta*, 2019, **316**, 8-18.
- 9 Q. Zhou, T.-T. Li, J. Wang, F. Guo and Y.-Q. Zheng, *Electrochim. Acta*, 2019, **296**, 1035-1041.
- 10 R. N. Wasalathanthri, S. Jeffrey, R. A. Awni, K. Sun and D. M. Giolando, *ACS Sustainable Chem. Eng.*, 2019, **7**, 3092-3100.
- 11 E. Li, Q. Mou, Z. Xu, J. Ma, X. Liu, G. Cheng, P. Zhao and H. Li, *Catal. Lett.*, 2022, DOI: 10.1007/s10562-021-03865-5.
- 12 J. Hou, Y. Sun, Z. Li, B. Zhang, S. Cao, Y. Wu, Z. Gao and L. Sun, *Adv. Funct. Mater.*, 2018, **28**, 1803278.
- 13 C. Panda, P. W. Menezes, M. Zheng, S. Orthmann and M. Driess, *ACS Energy Lett.*, 2019, **4**, 747-754.
- 14 D. Cao and D. Cheng, *Chem. Commun.*, 2019, **55**, 8154-8157.
- 15 J. Yang, H. Xuan, G. Zhang, R. Wang, J. Yang, X. Liang, Y. Li and P. Han, *Appl. Surf. Sci.*, 2021, **570**, 151181.
- 16 J. Niu, Y. Yue, C. Yang, Y. Wang, J. Qin, X. Zhang and Z.-S. Wu, *Appl. Surf. Sci.*, 2021, **561**, 150030.
